# Supplementary material for: RNA editing-induced structural and functional adaptations of NAD9 in Triticum aestivum under drought stress
Source: PubMed Central journal article supplement (PMC11590480; doi:10.3389/fpls.2024.1490288), 2024-11-06
Supplement: DataSheet1.pdf [file DataSheet1.pdf]

|                  |                   |                   |                   |                   |                    |                   |     |
|------------------|-------------------|-------------------|-------------------|-------------------|--------------------|-------------------|-----|
|                  |                   | 20                |                   | 40                |                    | 60                |     |
| nad9G168 DNA new | <b>ATGCTCTGTA</b> | <b>TAATACTTTT</b> | <b>CCCCGAGCGA</b> | <b>TGGTTTAGCG</b> | <b>TATTCGGAAT</b>  | <b>TGTACCCAAG</b> | 60  |
| nad9G168 CONTROL | .....             | .....             | .....             | .....             | .....              | .....             | 60  |
| nad9G1682H       | .....             | .....             | .....             | .....             | .....              | .....             | 60  |
| nad9G168 12H     | .....             | .....             | .....             | .....             | .....              | .....             | 60  |
|                  |                   | 80                |                   | 100               |                    | 120               |     |
| nad9G168 DNA new | <b>CCCTCCCATG</b> | <b>GGTTCTATAC</b> | <b>CCGATTCATA</b> | <b>ACTAGAGCAT</b> | <b>GCAGCCGATC</b>  | <b>CTGGATACAT</b> | 120 |
| nad9G168 CONTROL | .....             | .....             | .....             | .....             | .....              | .....             | 120 |
| nad9G1682H       | .....             | .....             | .....             | .....             | .....              | .....             | 120 |
| nad9G168 12H     | .....             | .....             | .....             | .....             | .....              | .....             | 120 |
|                  |                   | 140               |                   | 160               |                    | 180               |     |
| nad9G168 DNA new | <b>AACTCTAAAA</b> | <b>AGTGTGTGTG</b> | <b>CAGTTTTGGA</b> | <b>TCTTTATTGG</b> | <b>TAGCCAGTCT</b>  | <b>TTCACTTCTG</b> | 180 |
| nad9G168 CONTROL | .....             | .....             | .....             | .....             | .....              | .....             | 180 |
| nad9G1682H       | .....             | .....             | .....             | .....             | .....              | .....             | 180 |
| nad9G168 12H     | .....             | .....             | .....             | .....             | .....              | .....             | 180 |
|                  |                   | 200               |                   | 220               |                    | 240               |     |
| nad9G168 DNA new | <b>CCTCTCCACT</b> | <b>CCCATGCCTT</b> | <b>TCTTGGTCGG</b> | <b>ACCAACCCAA</b> | <b>CCGGCGATTT</b>  | <b>CCGACAAGTC</b> | 240 |
| nad9G168 CONTROL | .....             | .....             | .....             | .....             | .....              | .....             | 240 |
| nad9G1682H       | .....             | .....             | .....             | .....             | .....              | .....             | 240 |
| nad9G168 12H     | .....             | .....             | .....             | .....             | .....              | .....             | 240 |
|                  |                   | 260               |                   | 280               |                    | 300               |     |
| nad9G168 DNA new | <b>TTTCTGCTTA</b> | <b>GAGCAAGAAG</b> | <b>CGGAACCAAA</b> | <b>ATAAAGCTTT</b> | <b>CTTTATTTTC</b>  | <b>ATTTATGGAT</b> | 300 |
| nad9G168 CONTROL | .....             | .....             | .....             | .....             | .....              | .....             | 300 |
| nad9G1682H       | .....             | .....             | .....             | .....             | .....              | .....             | 300 |
| nad9G168 12H     | .....             | .....             | .....             | .....             | .....              | .....             | 300 |
|                  |                   | 320               |                   | 340               |                    | 360               |     |
| nad9G168 DNA new | <b>AACCAATCCA</b> | <b>TTTTCCAATA</b> | <b>TAGTTGGGAG</b> | <b>ATTTTACCCA</b> | <b>AGAAATGGGT</b>  | <b>ACATAAAATG</b> | 360 |
| nad9G168 CONTROL | .....             | .....             | .....             | .....             | .....              | .....             | 360 |
| nad9G1682H       | .....             | .....             | .....             | .....             | .....              | .....             | 360 |
| nad9G168 12H     | .....             | .....             | .....             | .....             | .....              | .....             | 360 |
|                  |                   | 380               |                   | 400               |                    | 420               |     |
| nad9G168 DNA new | <b>AAAAGATCGG</b> | <b>AACATGGGAA</b> | <b>TAGATCTTAT</b> | <b>ACCAATACTG</b> | <b>ACTACCCATT</b>  | <b>TCCATTGTTG</b> | 420 |
| nad9G168 CONTROL | .....             | .....             | .....             | .....             | .....              | .....             | 420 |
| nad9G1682H       | .....             | .....             | .....             | .....             | .....              | .....             | 420 |
| nad9G168 12H     | .....             | .....             | .....             | .....             | .....              | .....             | 420 |
|                  |                   | 440               |                   | 460               |                    | 480               |     |
| nad9G168 DNA new | <b>TGCTTTCTAA</b> | <b>AATGGCATA</b>  | <b>CTATACAAGG</b> | <b>GTTCAAGTTT</b> | <b>CGATCGATAT</b>  | <b>TTGCGGAGTG</b> | 480 |
| nad9G168 CONTROL | .....             | .....             | .....             | .....             | .....              | .....             | 480 |
| nad9G1682H       | .....             | .....             | .....             | .....             | .....              | .....             | 480 |
| nad9G168 12H     | .....             | .....             | .....             | .....             | .....              | .....             | 480 |
|                  |                   | 500               |                   | 520               |                    | 540               |     |
| nad9G168 DNA new | <b>GATCATCCCT</b> | <b>CTCGAAAACG</b> | <b>AAGATTTGAA</b> | <b>GTTGTCCATA</b> | <b>ATTTACTGAG</b>  | <b>TACTCGGTAT</b> | 540 |
| nad9G168 CONTROL | .....             | .....             | .....             | .....             | .....              | .....             | 540 |
| nad9G1682H       | .....             | .....             | .....             | .....             | .....              | .....             | 540 |
| nad9G168 12H     | .....             | .....             | .....             | .....             | .....              | .....             | 540 |
|                  |                   | 560               |                   | 580               |                    | 600               |     |
| nad9G168 DNA new | <b>AACTCACGCA</b> | <b>TTCGTGTACA</b> | <b>AACAAGTGCA</b> | <b>GACGAAGTAA</b> | <b>CACGAATATC</b>  | <b>TCCGGTAGTC</b> | 600 |
| nad9G168 CONTROL | .....             | .....             | .....             | .....             | .....              | .....             | 600 |
| nad9G1682H       | .....             | .....             | .....             | .....             | .....              | .....             | 600 |
| nad9G168 12H     | .....             | .....             | .....             | .....             | .....              | .....             | 600 |
|                  |                   | 620               |                   | 640               |                    | 660               |     |
| nad9G168 DNA new | <b>AGTCTATTTT</b> | <b>CATCAGCCGG</b> | <b>CCGGTGGGAG</b> | <b>CGAGAAGTAT</b> | <b>GGGATATGTC</b>  | <b>TGGTGTITTT</b> | 660 |
| nad9G168 CONTROL | .....             | .....             | .....             | .....             | .....              | .....             | 660 |
| nad9G1682H       | .....             | .....             | .....             | .....             | .....              | .....             | 660 |
| nad9G168 12H     | .....             | .....             | .....             | .....             | .....              | .....             | 660 |
|                  |                   | 680               |                   | 700               |                    | 720               |     |
| nad9G168 DNA new | <b>TCCATCAATC</b> | <b>ATCCGGATTT</b> | <b>ACGCCGTATA</b> | <b>TCAACAGATT</b> | <b>ATGGTTTCGA</b>  | <b>GGGTCATCCA</b> | 720 |
| nad9G168 CONTROL | .....             | .....             | .....             | .....             | .....              | .....             | 720 |
| nad9G1682H       | .....             | .....             | .....             | .....             | .....              | .....             | 720 |
| nad9G168 12H     | .....             | .....             | .....             | .....             | .....              | .....             | 720 |
|                  |                   | 740               |                   | 760               |                    | 780               |     |
| nad9G168 DNA new | <b>TTACGAAAAG</b> | <b>ACTTTCTCT</b>  | <b>GAGTGGATAT</b> | <b>GTGGAAGTAC</b> | <b>GCTATGATGA</b>  | <b>TCCAGAGAAA</b> | 780 |
| nad9G168 CONTROL | .....             | .....             | .....             | .....             | .....              | .....             | 780 |
| nad9G1682H       | .....             | .....             | .....             | .....             | .....              | .....             | 780 |
| nad9G168 12H     | .....             | .....             | .....             | .....             | .....              | .....             | 780 |
|                  |                   | 800               |                   | 820               |                    | 840               |     |
| nad9G168 DNA new | <b>CGTGTGGTTT</b> | <b>CTGAACCCAT</b> | <b>TGAGATGACC</b> | <b>CAAGAATTTT</b> | <b>GCTATTTTCGA</b> | <b>TTTTGCTAGT</b> | 840 |
| nad9G168 CONTROL | .....             | .....             | .....             | .....             | .....              | .....             | 840 |
| nad9G1682H       | .....             | .....             | .....             | .....             | .....              | .....             | 840 |
| nad9G168 12H     | .....             | .....             | .....             | .....             | .....              | .....             | 840 |
|                  |                   | 860               |                   |                   |                    |                   |     |
| nad9G168 DNA new | <b>CCTTGGGAAC</b> | <b>AGCGTAGCGA</b> | <b>CGGATAA</b>    |                   |                    |                   | 867 |
| nad9G168 CONTROL | .....             | .....             | .....             | .....             | .....              | .....             | 867 |
| nad9G1682H       | .....             | .....             | .....             | .....             | .....              | .....             | 867 |
| nad9G168 12H     | .....             | .....             | .....             | .....             | .....              | .....             | 867 |
