# Supplementary material for: RNA editing-induced structural and functional adaptations of NAD9 in Triticum aestivum under drought stress
Source: PubMed Central journal article supplement (PMC11590480; doi:10.3389/fpls.2024.1490288), 2024-11-06
Supplement: DataSheet2.pdf [file DataSheet2.pdf]

|                 |                   |                   |                   |                   |                   |                    |     |
|-----------------|-------------------|-------------------|-------------------|-------------------|-------------------|--------------------|-----|
|                 |                   | 20                |                   | 40                |                   | 60                 |     |
| nad9GM10DNA new | <b>ATGCTCTGTA</b> | <b>TAATACTTTT</b> | <b>CCCCGAGCGA</b> | <b>TGGTTTAGCG</b> | <b>TATTCGGAAT</b> | <b>TGTACCCAAG</b>  | 60  |
| nad9GM10control | .....             | .....             | .....             | .....             | .....             | .....              | 60  |
| nad9GM10 2H     | .....             | .....             | .....             | .....             | .....             | .....              | 60  |
| nad9GM10 12H    | .....             | .....             | .....             | .....             | .....             | .....              | 60  |
|                 |                   | 80                |                   | 100               |                   | 120                |     |
| nad9GM10DNA new | <b>CCCTCCCATG</b> | <b>GGTTCATATC</b> | <b>CCGATTCATA</b> | <b>ACTAGAGCAT</b> | <b>GCAGCCGATC</b> | <b>CTGGATACAT</b>  | 120 |
| nad9GM10control | .....             | .....             | .....             | .....             | .....             | .....              | 120 |
| nad9GM10 2H     | .....             | .....             | .....             | .....             | .....             | .....              | 120 |
| nad9GM10 12H    | .....             | .....             | .....             | .....             | .....             | .....              | 120 |
|                 |                   | 140               |                   | 160               |                   | 180                |     |
| nad9GM10DNA new | <b>AACTCTAAAA</b> | <b>AGTGTGTGTG</b> | <b>CAGTTTTGGA</b> | <b>TCTTTATTGG</b> | <b>TAGCCAGTCT</b> | <b>TTCACCTTCTG</b> | 180 |
| nad9GM10control | .....             | .....             | .....             | .....             | .....             | .....              | 180 |
| nad9GM10 2H     | .....             | .....             | .....             | .....             | .....             | .....T.....        | 180 |
| nad9GM10 12H    | .....             | .....             | .....             | .....             | .....             | .....T.....        | 180 |
|                 |                   | 200               |                   | 220               |                   | 240                |     |
| nad9GM10DNA new | <b>CCTCTCCACT</b> | <b>CCCATGCCTT</b> | <b>TCTTGGTCGG</b> | <b>ACCAACCCAA</b> | <b>CCGGCGATTT</b> | <b>CCGACAAGTC</b>  | 240 |
| nad9GM10control | .....             | .....             | .....T.....       | .....             | .....             | .....              | 240 |
| nad9GM10 2H     | .....             | .....             | .....T.....       | .....             | .....             | .....              | 240 |
| nad9GM10 12H    | .....             | .....             | .....T.....       | .....             | .....             | .....              | 240 |
|                 |                   | 260               |                   | 280               |                   | 300                |     |
| nad9GM10DNA new | <b>TTTCTGCTTA</b> | <b>GAGCAAGAAG</b> | <b>CGGAACCAAA</b> | <b>ATAAAGCTTT</b> | <b>CTTTATTTTC</b> | <b>ATTTATGGAT</b>  | 300 |
| nad9GM10control | .....             | .....             | .....             | .....             | .....             | .....              | 300 |
| nad9GM10 2H     | .....             | .....             | .....             | .....             | .....             | .....              | 300 |
| nad9GM10 12H    | .....             | .....             | .....             | .....             | .....             | .....              | 300 |
|                 |                   | 320               |                   | 340               |                   | 360                |     |
| nad9GM10DNA new | <b>AACCAATCCA</b> | <b>TTTTCCAATA</b> | <b>TAGTTGGGAG</b> | <b>ATTTTACCCA</b> | <b>AGAAATGGGT</b> | <b>ACATAAAATG</b>  | 360 |
| nad9GM10control | .....T.....       | .....             | .....             | .....             | .....             | .....              | 360 |
| nad9GM10 2H     | .....T.....       | .....             | .....             | .....             | .....             | .....              | 360 |
| nad9GM10 12H    | .....T.....       | .....             | .....             | .....             | .....             | .....              | 360 |
|                 |                   | 380               |                   | 400               |                   | 420                |     |
| nad9GM10DNA new | <b>AAAAGATCGG</b> | <b>AACATGGGAA</b> | <b>TAGATCTTAT</b> | <b>ACCAATACTG</b> | <b>ACTACCCATT</b> | <b>TCCATTGTTG</b>  | 420 |
| nad9GM10control | .....             | .....             | .....T.....       | .....             | .....T.T.....     | .....              | 420 |
| nad9GM10 2H     | .....             | .....             | .....T.....       | .....             | .....T.T.....     | .....              | 420 |
| nad9GM10 12H    | .....             | .....             | .....T.....       | .....             | .....T.T.....     | .....              | 420 |
|                 |                   | 440               |                   | 460               |                   | 480                |     |
| nad9GM10DNA new | <b>TGCTTTCTAA</b> | <b>AATGGCATAc</b> | <b>CTATACAAGG</b> | <b>GTTCAAGTTT</b> | <b>CGATCGATAT</b> | <b>TTGCGGAGTG</b>  | 480 |
| nad9GM10control | .....             | .....             | .....             | .....             | T.....            | .....              | 480 |
| nad9GM10 2H     | .....             | .....             | .....             | .....             | T.....            | .....              | 480 |
| nad9GM10 12H    | .....             | .....             | .....             | .....             | T.....            | .....              | 480 |
|                 |                   | 500               |                   | 520               |                   | 540                |     |
| nad9GM10DNA new | <b>GATCATCCCT</b> | <b>CTCGAAAACG</b> | <b>AAGATTTGAA</b> | <b>GTTGTCCATA</b> | <b>ATTTACTGAG</b> | <b>TACTCGGTAT</b>  | 540 |
| nad9GM10control | .....T.....       | .....             | .....             | .....T.....       | .....             | .....              | 540 |
| nad9GM10 2H     | .....T.....       | .....             | .....             | .....T.....       | .....             | .....              | 540 |
| nad9GM10 12H    | .....T.....       | .....             | .....             | .....T.....       | .....             | .....              | 540 |
|                 |                   | 560               |                   | 580               |                   | 600                |     |
| nad9GM10DNA new | <b>AACTCACGCA</b> | <b>TTCGTGTACA</b> | <b>AACAAGTGCA</b> | <b>GACGAAGTAA</b> | <b>CACGAATATC</b> | <b>TCCGGTAGTC</b>  | 600 |
| nad9GM10control | .....             | .....             | .....             | .....             | .....             | .....T.....        | 600 |
| nad9GM10 2H     | .....             | .....             | .....             | .....             | .....             | .....T.....        | 600 |
| nad9GM10 12H    | .....             | .....             | .....             | .....             | .....             | .....T.....        | 600 |
|                 |                   | 620               |                   | 640               |                   | 660                |     |
| nad9GM10DNA new | <b>AGTCTATTTT</b> | <b>CATCAGCCGG</b> | <b>CCGGTGGGAG</b> | <b>CGAGAAGTAT</b> | <b>GGGATATGTC</b> | <b>TGGTGTITCT</b>  | 660 |
| nad9GM10control | .....             | .....             | .....T.....       | .....             | .....T.....       | .....              | 660 |
| nad9GM10 2H     | .....             | .....             | .....T.....       | .....             | .....T.....       | .....              | 660 |
| nad9GM10 12H    | .....             | .....             | .....T.....       | .....             | .....T.....       | .....              | 660 |
|                 |                   | 680               |                   | 700               |                   | 720                |     |
| nad9GM10DNA new | <b>TCCATCAATC</b> | <b>ATCCGGATTT</b> | <b>ACGCCGTATA</b> | <b>TCAACAGATT</b> | <b>ATGGTTTCGA</b> | <b>GGGTCATCCA</b>  | 720 |
| nad9GM10control | .....             | .....             | .....             | .....T.....       | .....             | .....              | 720 |
| nad9GM10 2H     | .....T.....       | .....             | .....             | .....T.....       | .....             | .....              | 720 |
| nad9GM10 12H    | .....T.....       | .....             | .....             | .....T.....       | .....             | .....              | 720 |
|                 |                   | 740               |                   | 760               |                   | 780                |     |
| nad9GM10DNA new | <b>TTACGAAAAG</b> | <b>ACTTTCCTCT</b> | <b>GAGTGGATAT</b> | <b>GTGGAAGTAC</b> | <b>GCTATGATGA</b> | <b>TCCAGAGAAA</b>  | 780 |
| nad9GM10control | .....             | .....             | .....             | .....             | .....             | .....              | 780 |
| nad9GM10 2H     | .....             | .....             | .....             | .....             | .....             | .....              | 780 |
| nad9GM10 12H    | .....             | .....             | .....             | .....             | .....T.....       | .....              | 780 |
|                 |                   | 800               |                   | 820               |                   | 840                |     |
| nad9GM10DNA new | <b>CGTGTGGTTT</b> | <b>CTGAACCCAT</b> | <b>TGAGATGACC</b> | <b>CAAGAATTTT</b> | <b>GCTATTTCGA</b> | <b>TTTTGCTAGT</b>  | 840 |
| nad9GM10control | .....             | .....             | .....A.....       | .....             | .....T.....       | .....A.....        | 840 |
| nad9GM10 2H     | .....             | .....             | .....A.....       | .....             | .....             | .....A.....        | 840 |
| nad9GM10 12H    | .....             | .....             | .....A.....       | .....             | .....             | .....A.....        | 840 |
|                 |                   | 860               |                   |                   |                   |                    |     |
| nad9GM10DNA new | <b>CCTTGGGAAC</b> | <b>AGCGTAGCGA</b> | <b>CGGATAA</b>    | 867               |                   |                    |     |
| nad9GM10control | .....             | .....C.....       | T.....            | 867               |                   |                    |     |
| nad9GM10 2H     | .....             | .....C.....       | T.....            | 867               |                   |                    |     |
| nad9GM10 12H    | .....             | .....C.....       | T.....            | 867               |                   |                    |     |
