# Supplementary material for: RNA editing-induced structural and functional adaptations of NAD9 in Triticum aestivum under drought stress
Source: PubMed Central journal article supplement (PMC11590480; doi:10.3389/fpls.2024.1490288), 2024-11-06

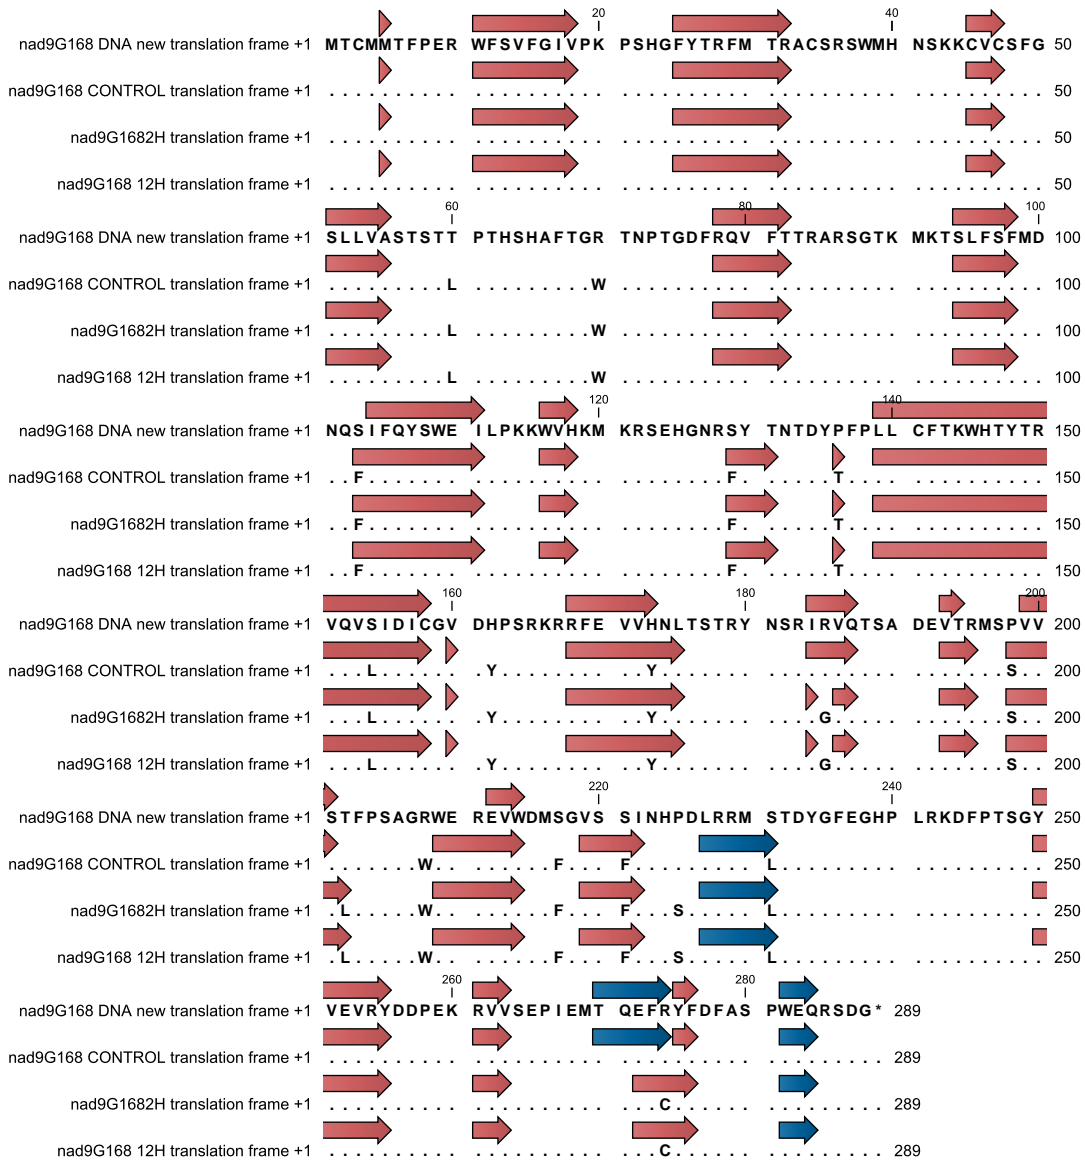

Supplement: DataSheet3.pdf [file DataSheet3.pdf]
